# Supplementary material for: Syntheses, structures, and one- and two-photon excited fluorescence of dimesitylboryl-ended quadrupolar hybrid oligothiophenes
Source: Royal Society of Chemistry journal article supplement (doi:10.1039/d1nj00694k), 2021-01-01
Supplement: d1nj00694k1.pdf [file d1nj00694k1.pdf]

## Supporting Information

### **Syntheses, structures, one- and two-photon excited fluorescence of dimesitylboryl-ended quadrupolar hybrid-oligothiophenes**

Senhao Zhou,<sup>§a</sup> Shiqian Zhang,<sup>§a</sup> Jinsong Li,<sup>a</sup> Zhiqiang Liu,<sup>a,b\*</sup> Xiaoqiang Yu<sup>a\*</sup>

<sup>a</sup>State Key Laboratory of Crystal Materials, Shandong University, Jinan 250100,  
China

<sup>b</sup>Shenzhen Research Institute of Shandong University, Shenzhen 518057, China

<sup>§</sup>These authors contribute equally.

E-mail: [zqliu@sdu.edu.cn](mailto:zqliu@sdu.edu.cn); [yuxq@sdu.edu.cn](mailto:yuxq@sdu.edu.cn)

### **Table of contents**

|                                                         |        |
|---------------------------------------------------------|--------|
| Single crystal structure data                           | S2-S3  |
| Absorption and emission spectra                         | S4-S8  |
| <sup>1</sup> H NMR, <sup>13</sup> C NMR, and MS spectra | S9-S22 |

Table S-1. Crystallographic parameters for compounds **1** and **2**

|                                             | 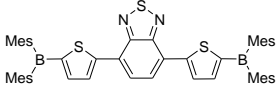 |  |
|---------------------------------------------|-----------------------------------------------------------------------------------|------------------------------------------------------------------------------------|
|                                             | <b>1</b>                                                                          | <b>2</b>                                                                           |
| CCDC Number                                 | 2062056                                                                           | 2062057                                                                            |
| Empirical formula                           | C <sub>50</sub> H <sub>48</sub> B <sub>2</sub> N <sub>2</sub> S <sub>3</sub>      | C <sub>50</sub> H <sub>50</sub> B <sub>2</sub> S <sub>4</sub>                      |
| Formula weight                              | 794.70                                                                            | 892.89                                                                             |
| Temperature/K                               | 296(2)                                                                            | 296.15                                                                             |
| Crystal system                              | monoclinic                                                                        | monoclinic                                                                         |
| Space group                                 | P2 <sub>1</sub> /c                                                                | P2 <sub>1</sub> /n                                                                 |
| a/Å                                         | 8.2837(10)                                                                        | 17.1329(4)                                                                         |
| b/Å                                         | 16.1677(3)                                                                        | 8.2168(2)                                                                          |
| c/Å                                         | 16.6633(3)                                                                        | 19.5322(4)                                                                         |
| α/°                                         | 90                                                                                | 90                                                                                 |
| β/°                                         | 93.001(10)                                                                        | 113.3421(13)                                                                       |
| γ/°                                         | 90                                                                                | 90                                                                                 |
| Volume/Å <sup>3</sup>                       | 2228.63(6)                                                                        | 2524.65(10)                                                                        |
| Z                                           | 2                                                                                 | 2                                                                                  |
| ρ <sub>calc</sub> /g/cm <sup>3</sup>        | 1.184                                                                             | 1.175                                                                              |
| μ/mm <sup>-1</sup>                          | 0.202                                                                             | 0.224                                                                              |
| F(000)                                      | 840.0                                                                             | 948.0                                                                              |
| Crystal size/mm <sup>3</sup>                | 0.4 × 0.38 × 0.3                                                                  | 0.4 × 0.2 × 0.04                                                                   |
| Radiation                                   | Mo Kα (λ = 0.71073)                                                               | Mo Kα (λ = 0.71073)                                                                |
| 2θ range for data collection/°              | 3.512 to 55.016                                                                   | 4.064 to 54.952                                                                    |
| Index ranges                                | -10 ≤ h ≤ 10, -18 ≤ k ≤ 21, -19 ≤ l ≤ 21                                          | -22 ≤ h ≤ 22, -10 ≤ k ≤ 10, -25 ≤ l ≤ 25                                           |
| Reflections collected                       | 19664                                                                             | 42323                                                                              |
| Independent reflections                     | 5112 [R <sub>int</sub> = 0.0256, R <sub>sigma</sub> = 0.0287]                     | 5782 [R <sub>int</sub> = 0.0576, R <sub>sigma</sub> = 0.0378]                      |
| Data/restraints/parameters                  | 5114/0/277                                                                        | 5782/87/311                                                                        |
| Goodness-of-fit on F <sup>2</sup>           | 1.020                                                                             | 1.027                                                                              |
| Final R indexes [I ≥ 2σ (I)]                | R <sub>1</sub> = 0.0570, wR <sub>2</sub> = 0.1579                                 | R <sub>1</sub> = 0.0482, wR <sub>2</sub> = 0.1272                                  |
| Final R indexes [all data]                  | R <sub>1</sub> = 0.0793, wR <sub>2</sub> = 0.1707                                 | R <sub>1</sub> = 0.0867, wR <sub>2</sub> = 0.1511                                  |
| Largest diff. peak/hole / e Å <sup>-3</sup> | 0.28/-0.24                                                                        | 0.21/-0.31                                                                         |

Table S-2. Crystallographic parameters for compounds **3** and **5**

|                                             | 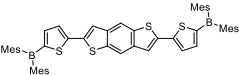 |  |
|---------------------------------------------|-----------------------------------------------------------------------------------|-------------------------------------------------------------------------------------|
|                                             | <b>3</b>                                                                          | <b>5</b>                                                                            |
| CCDC Number                                 | 2062059                                                                           | 2062058                                                                             |
| Empirical formula                           | C <sub>54</sub> H <sub>52</sub> B <sub>2</sub> S <sub>4</sub>                     | C <sub>30</sub> H <sub>29</sub> BS <sub>2</sub>                                     |
| Formula weight                              | 850.81                                                                            | 464.46                                                                              |
| Temperature/K                               | 297                                                                               | 297(2)                                                                              |
| Crystal system                              | monoclinic                                                                        | triclinic                                                                           |
| Space group                                 | C2/c                                                                              | P-1                                                                                 |
| a/Å                                         | 42.4881(14)                                                                       | 7.99790(10)                                                                         |
| b/Å                                         | 15.1359(5)                                                                        | 11.7834(2)                                                                          |
| c/Å                                         | 8.0769(2)                                                                         | 13.5026(2)                                                                          |
| α/°                                         | 90                                                                                | 96.2150(10)                                                                         |
| β/°                                         | 92.305(3)                                                                         | 93.8950(10)                                                                         |
| γ/°                                         | 90                                                                                | 100.2200(10)                                                                        |
| Volume/Å <sup>3</sup>                       | 5190.0(3)                                                                         | 1240.02(3)                                                                          |
| Z                                           | 4                                                                                 | 2                                                                                   |
| ρ <sub>calc</sub> /cm <sup>3</sup>          | 1.089                                                                             | 1.244                                                                               |
| μ/mm <sup>-1</sup>                          | 1.915                                                                             | 0.231                                                                               |
| F(000)                                      | 1800.0                                                                            | 492.0                                                                               |
| Crystal size/mm <sup>3</sup>                | 0.13 × 0.11 × 0.08                                                                | 0.99 × 0.16 × 0.08                                                                  |
| Radiation                                   | Cu Kα (λ = 1.54184)                                                               | MoKα (λ = 0.71073)                                                                  |
| 2θ range for data collection/°              | 8.33 to 153.472                                                                   | 3.046 to 54.584                                                                     |
| Index ranges                                | -52 ≤ h ≤ 53, -19 ≤ k ≤ 19, -6 ≤ l ≤ 10                                           | -10 ≤ h ≤ 10, -15 ≤ k ≤ 14, -17 ≤ l ≤ 16                                            |
| Reflections collected                       | 16352                                                                             | 19365                                                                               |
| Independent reflections                     | 5105 [R <sub>int</sub> = 0.0488, R <sub>sigma</sub> = 0.0500]                     | 5465 [R <sub>int</sub> = 0.0193, R <sub>sigma</sub> = 0.0179]                       |
| Data/restraints/parameters                  | 5105/291/320                                                                      | 5465/0/324                                                                          |
| Goodness-of-fit on F <sup>2</sup>           | 1.1175                                                                            | 1.019                                                                               |
| Final R indexes [I ≥ 2σ (I)]                | R <sub>1</sub> = 0.0839, wR <sub>2</sub> = 0.1935                                 | R <sub>1</sub> = 0.0347, wR <sub>2</sub> = 0.0949                                   |
| Final R indexes [all data]                  | R <sub>1</sub> = 0.0947, wR <sub>2</sub> = 0.1977                                 | R <sub>1</sub> = 0.0375, wR <sub>2</sub> = 0.0977                                   |
| Largest diff. peak/hole / e Å <sup>-3</sup> | 0.24/-0.26                                                                        | 0.34/-0.27                                                                          |

(a)

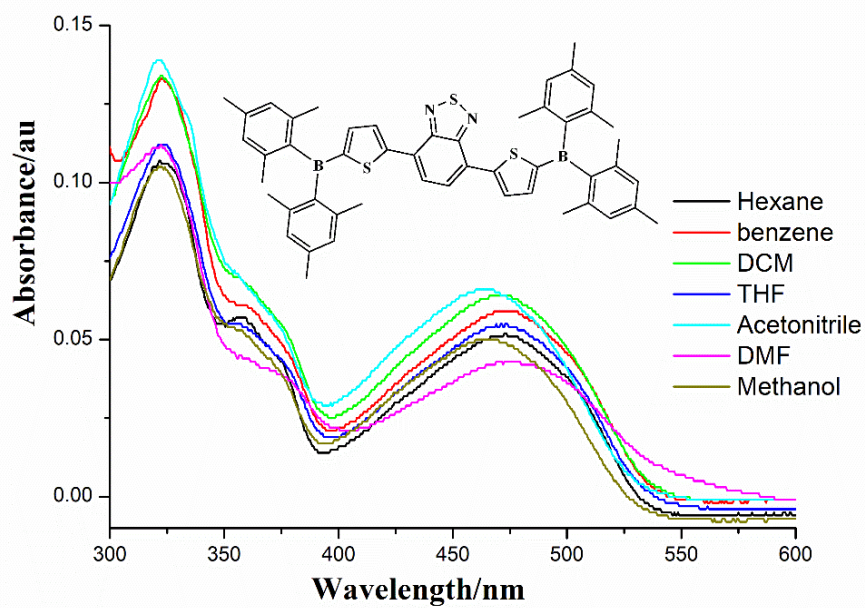

(b)

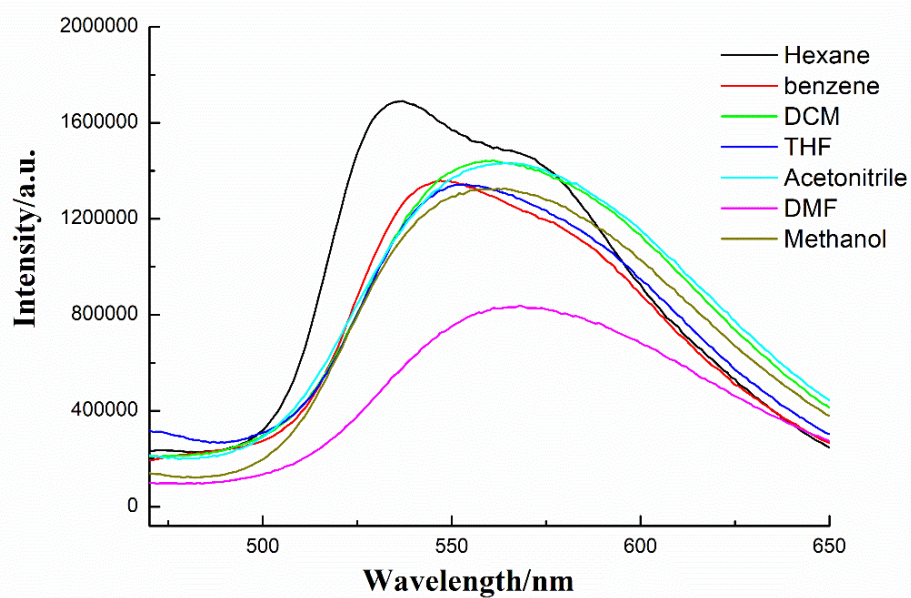

Figure S-1. Absorption (a) and emission (b) spectra of compound 1.  
( $C = 2.5 \mu\text{M}$ ,  $\lambda_{\text{ex}} = 460 \text{ nm}$ )

(a)

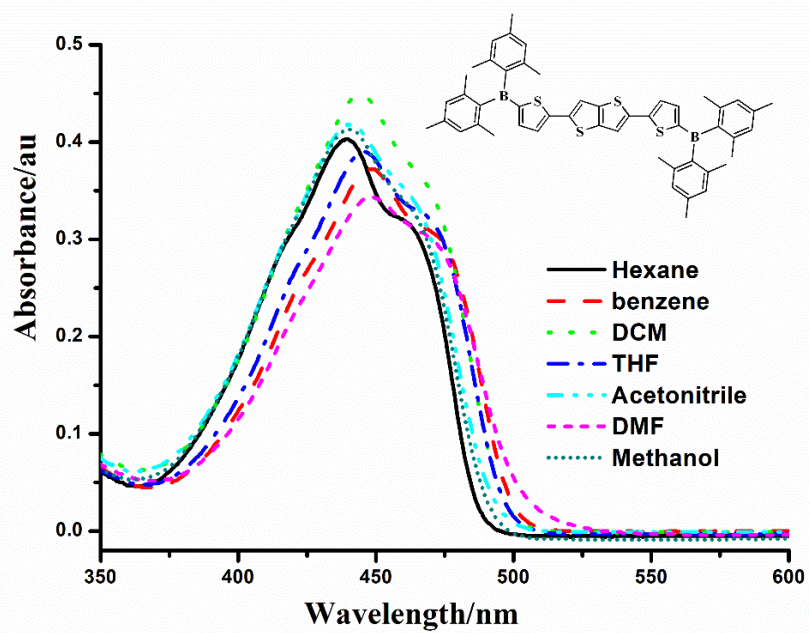

(b)

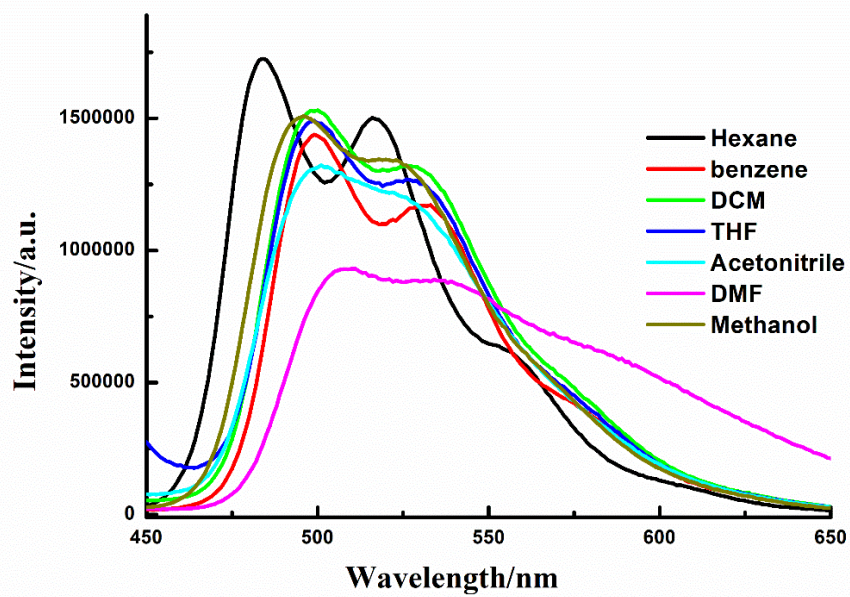

Figure S-2. Absorption (a) and emission (b) spectra of compound 2.  
( $C = 4.7 \mu\text{M}$ ,  $\lambda_{\text{ex}} = 440 \text{ nm}$ )

(a)

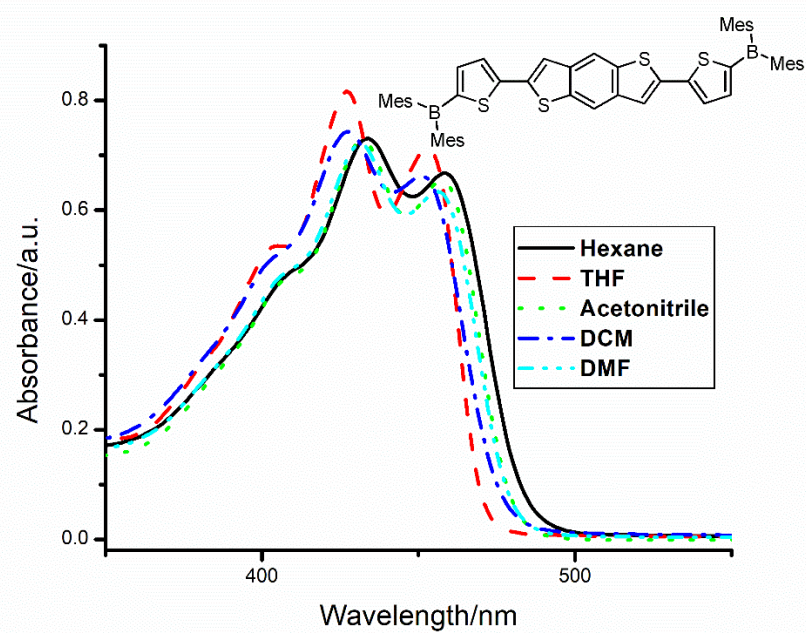

(b)

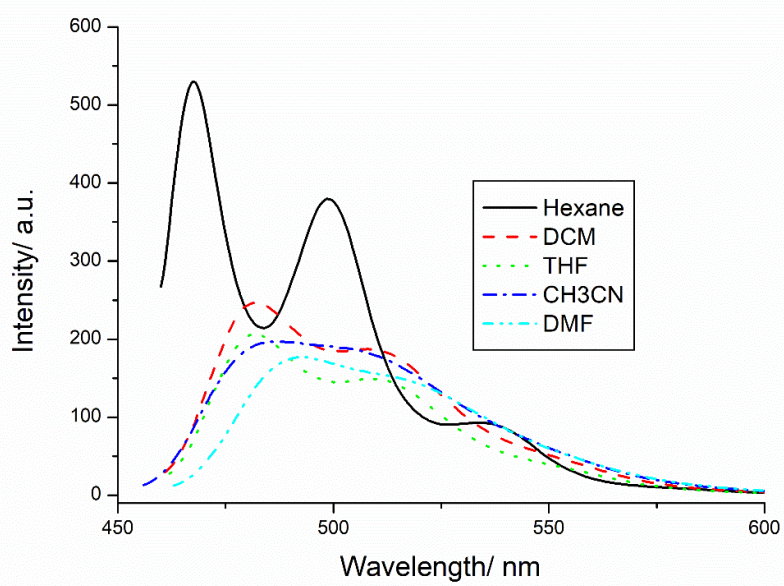

Figure S-3. Absorption (a) and emission (b) spectra of compound **3**.  
( $C = 10.0 \mu\text{M}$ ,  $\lambda_{\text{ex}} = 440 \text{ nm}$ )

(a)

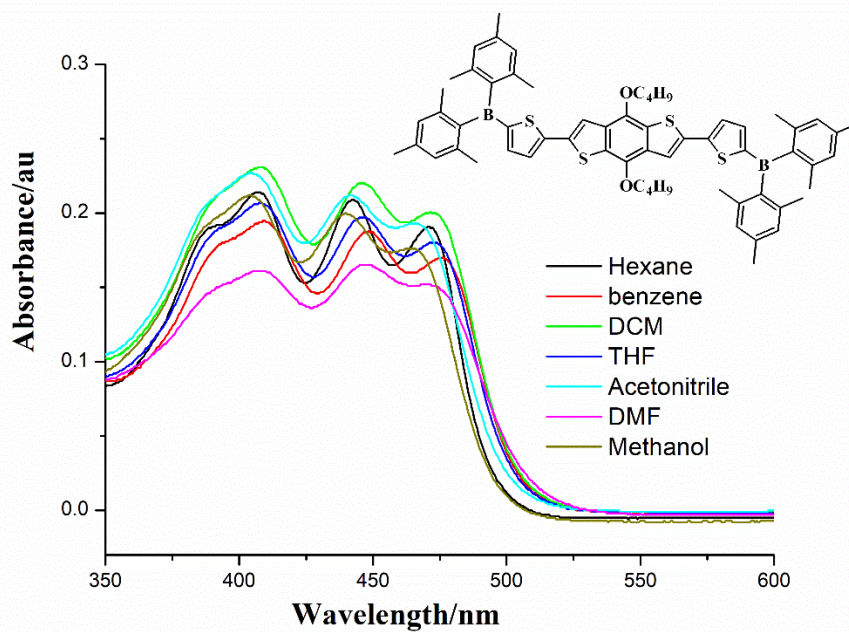

(b)

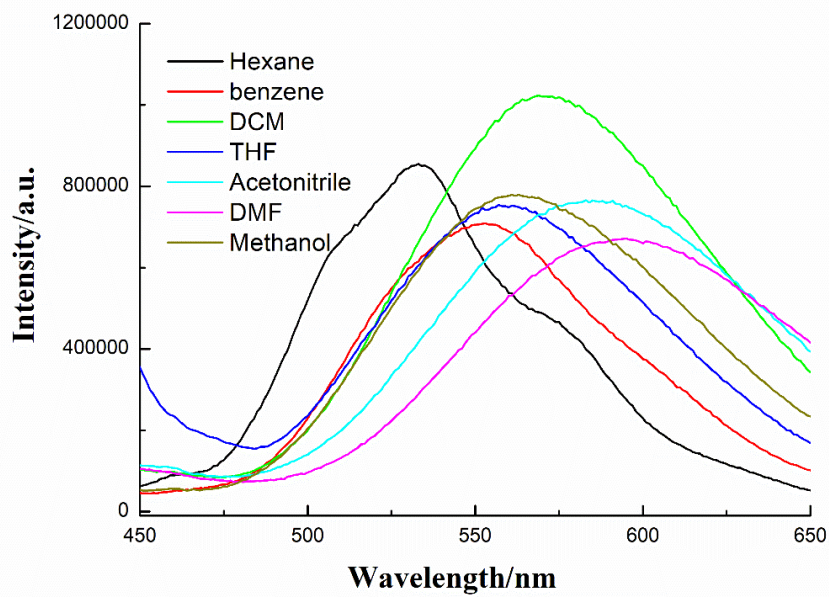

Figure S-4. Absorption (a) and emission (b) spectra of compound 4.  
( $C = 3.0 \mu\text{M}$ ,  $\lambda_{\text{ex}} = 440 \text{ nm}$ )

(a)

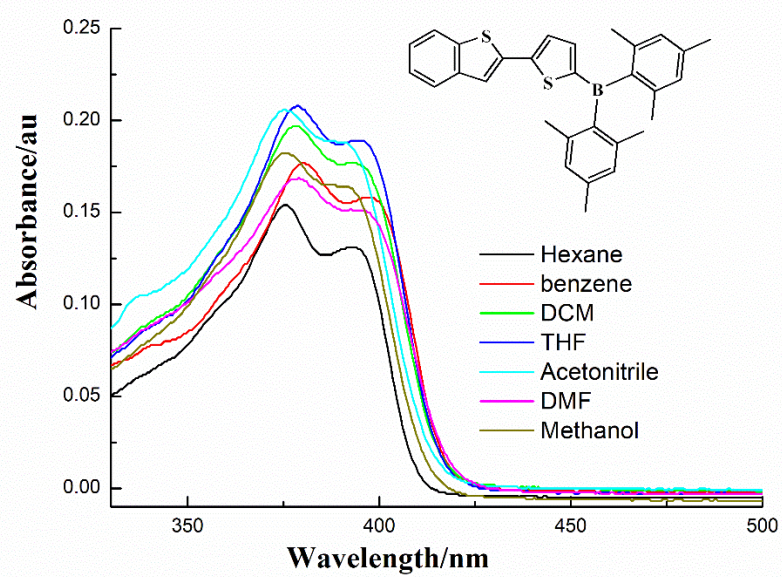

(b)

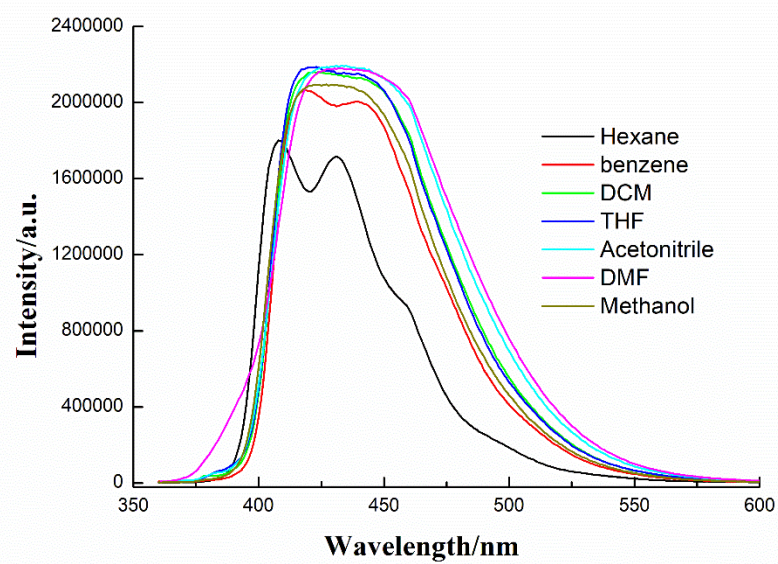

Figure S-5. Absorption (a) and emission (b) spectra of compound 5.  
( $C = 7.0 \mu\text{M}$ ,  $\lambda_{\text{ex}} = 330 \text{ nm}$ )



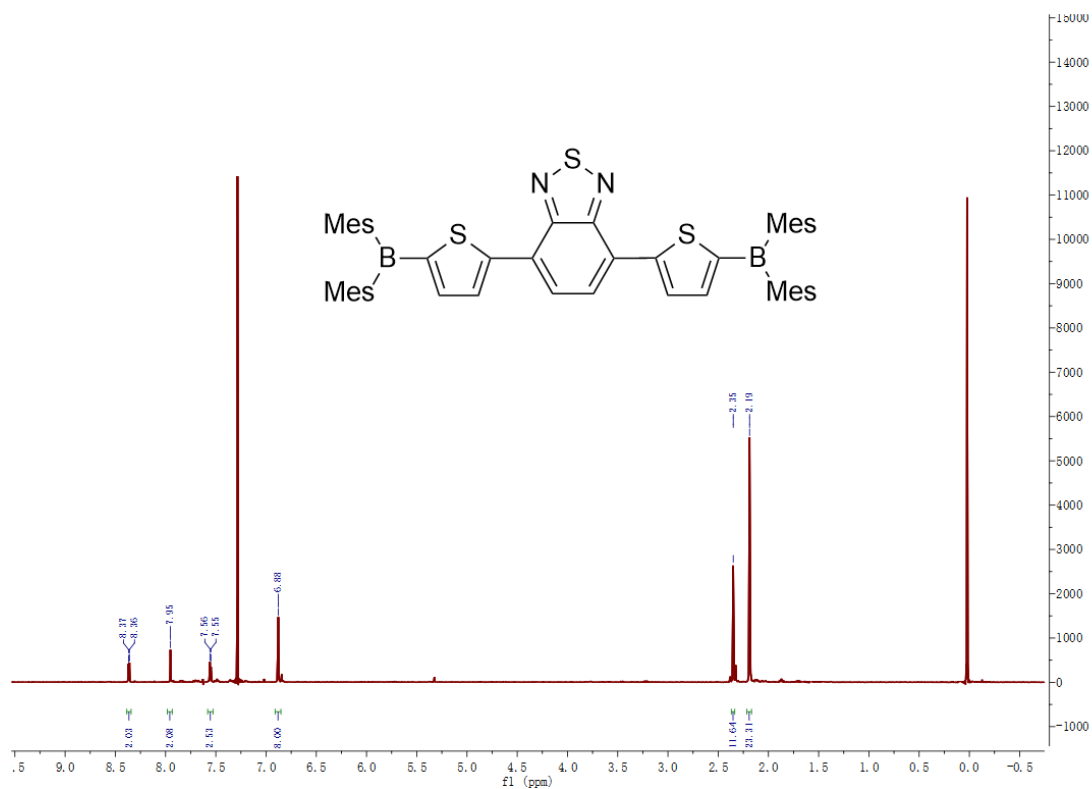

Figure S-6. <sup>1</sup>H NMR spectrum of compound **1** (400 MHz, CDCl<sub>3</sub>).

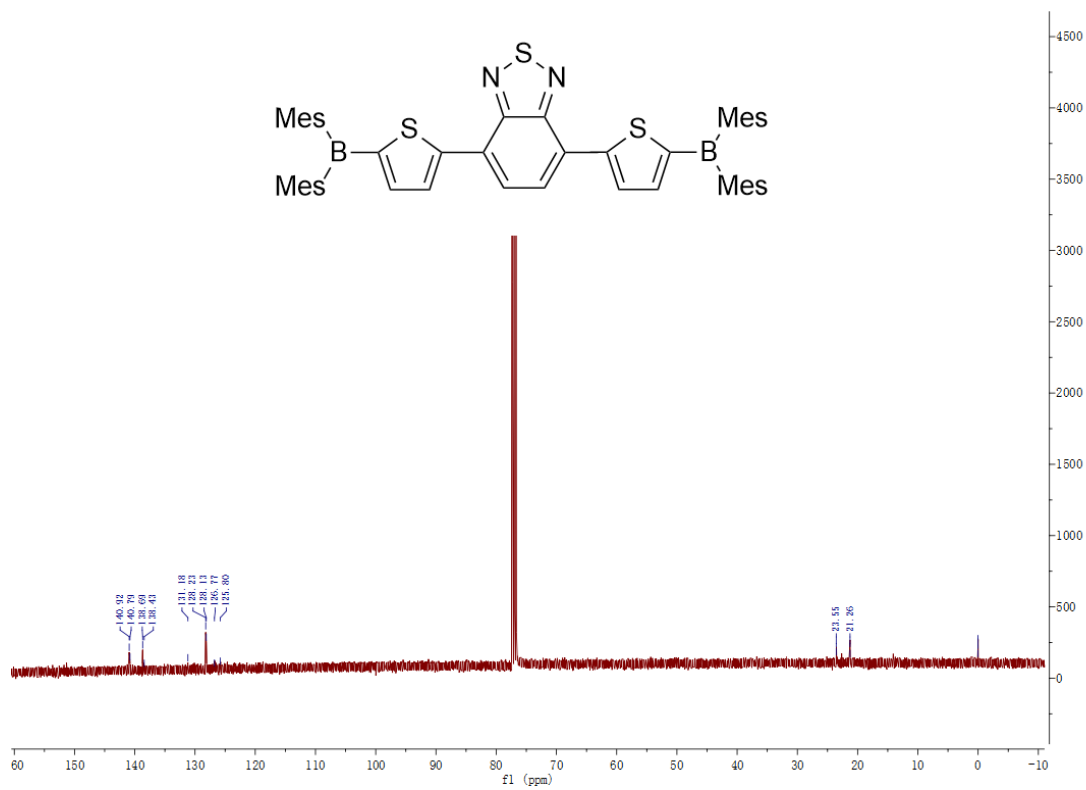

Figure S-7. <sup>13</sup>C NMR spectrum of compound **1** (100 MHz, CDCl<sub>3</sub>).

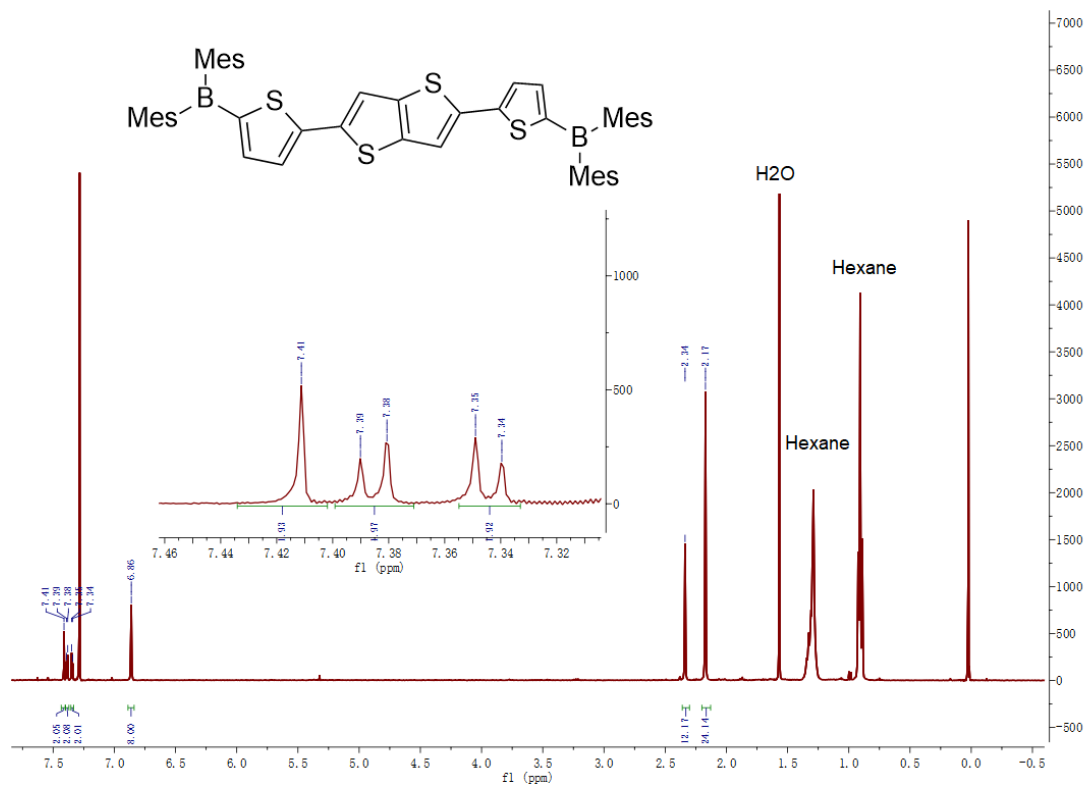

Figure S-8.  $^1\text{H}$  NMR spectrum of compound **2** (400 MHz,  $\text{CDCl}_3$ ).

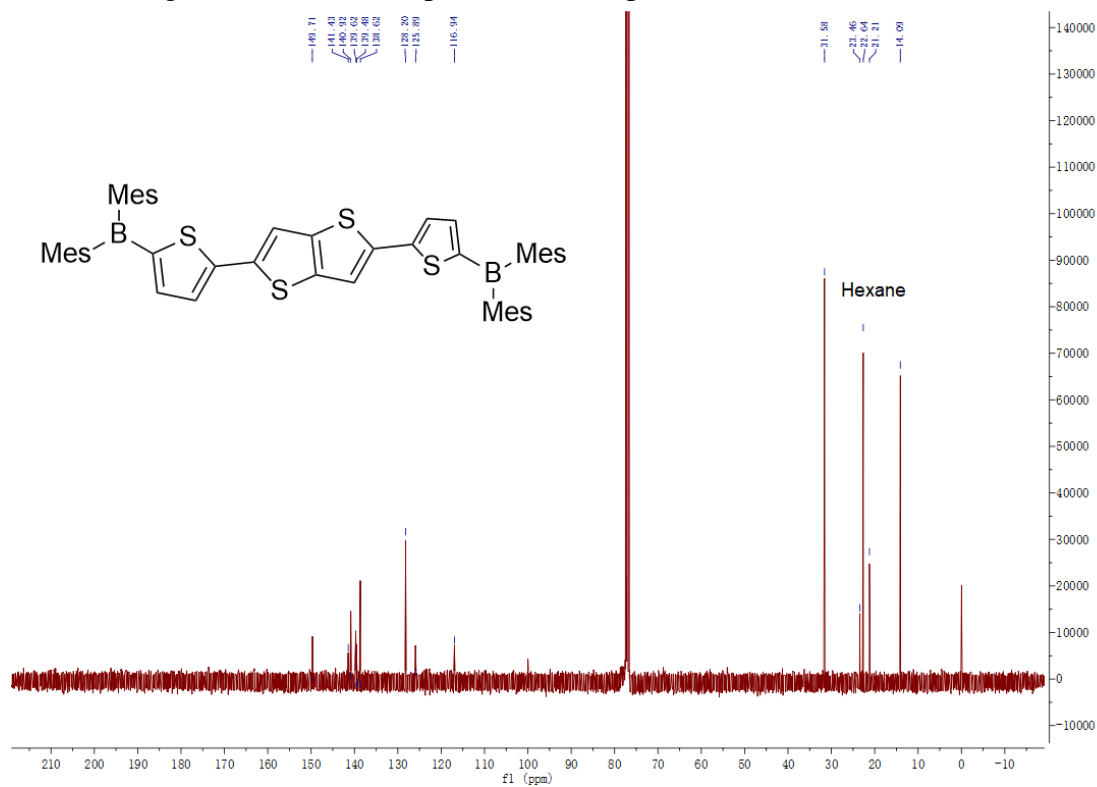

Figure S-9.  $^{13}\text{C}$  NMR spectrum of compound **2** (100 MHz,  $\text{CDCl}_3$ ).

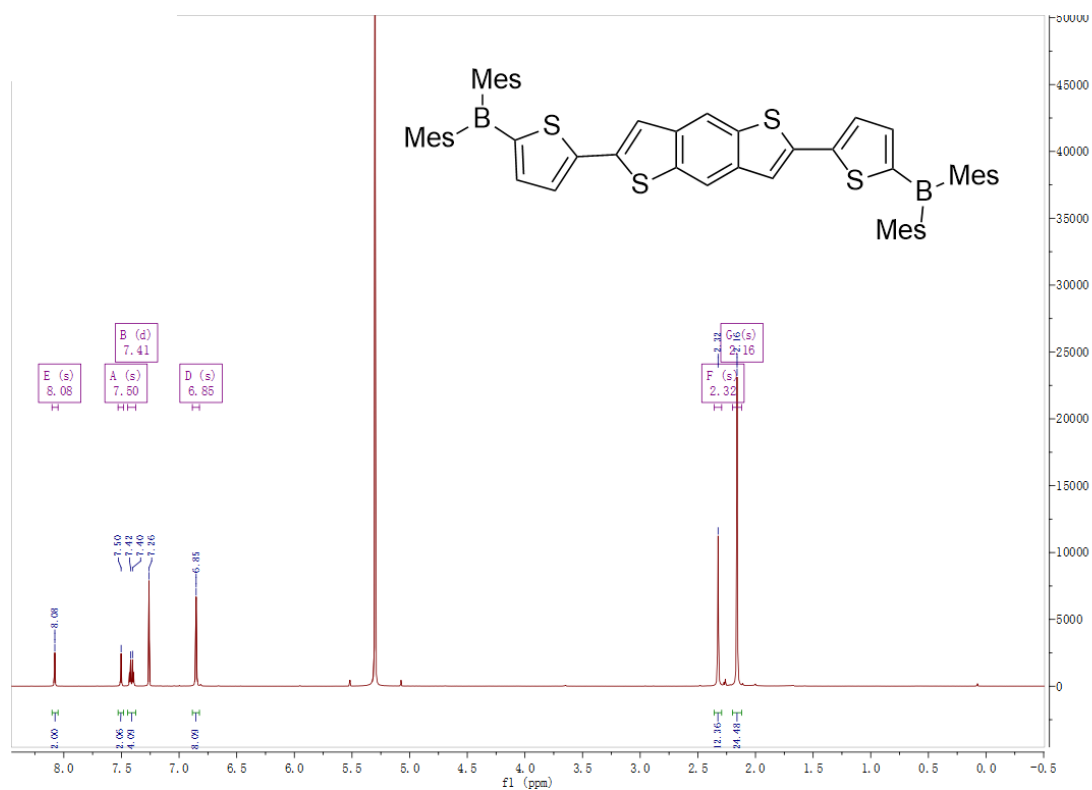

Figure S-10.  $^1\text{H}$  NMR spectrum of compound **3** (400 MHz,  $\text{CDCl}_3$ ).

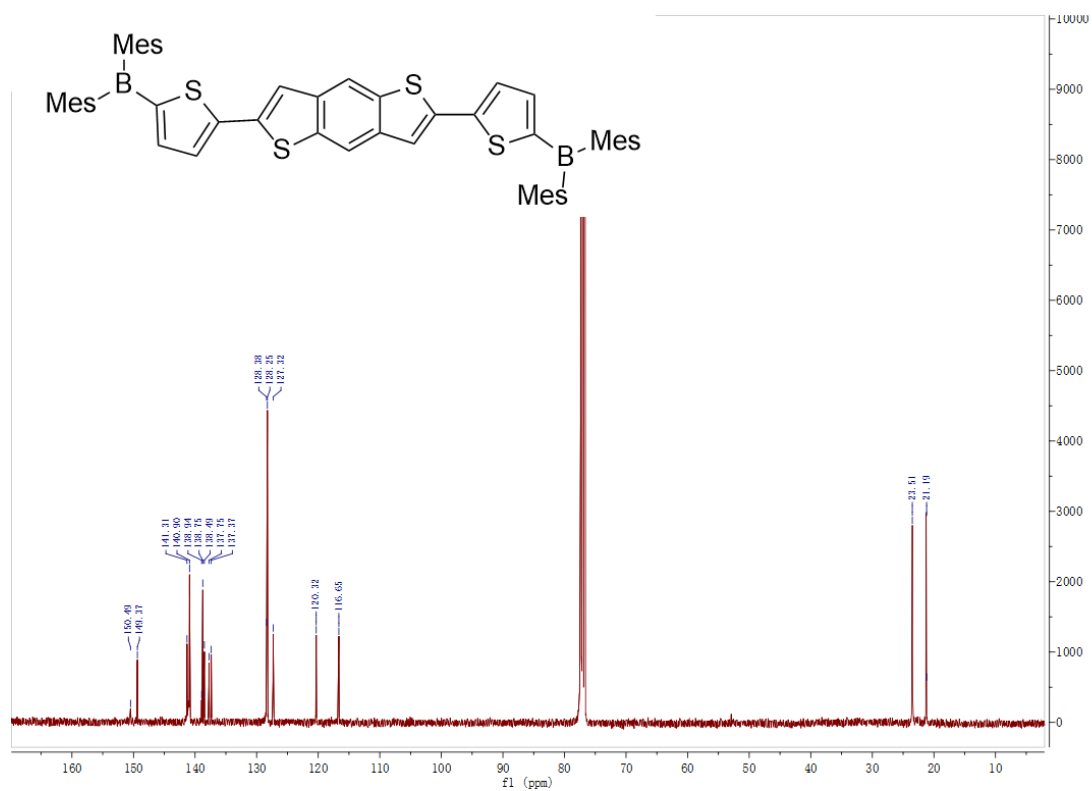

Figure S-11.  $^{13}\text{C}$  NMR spectrum of compound **3** (100 MHz,  $\text{CDCl}_3$ ).

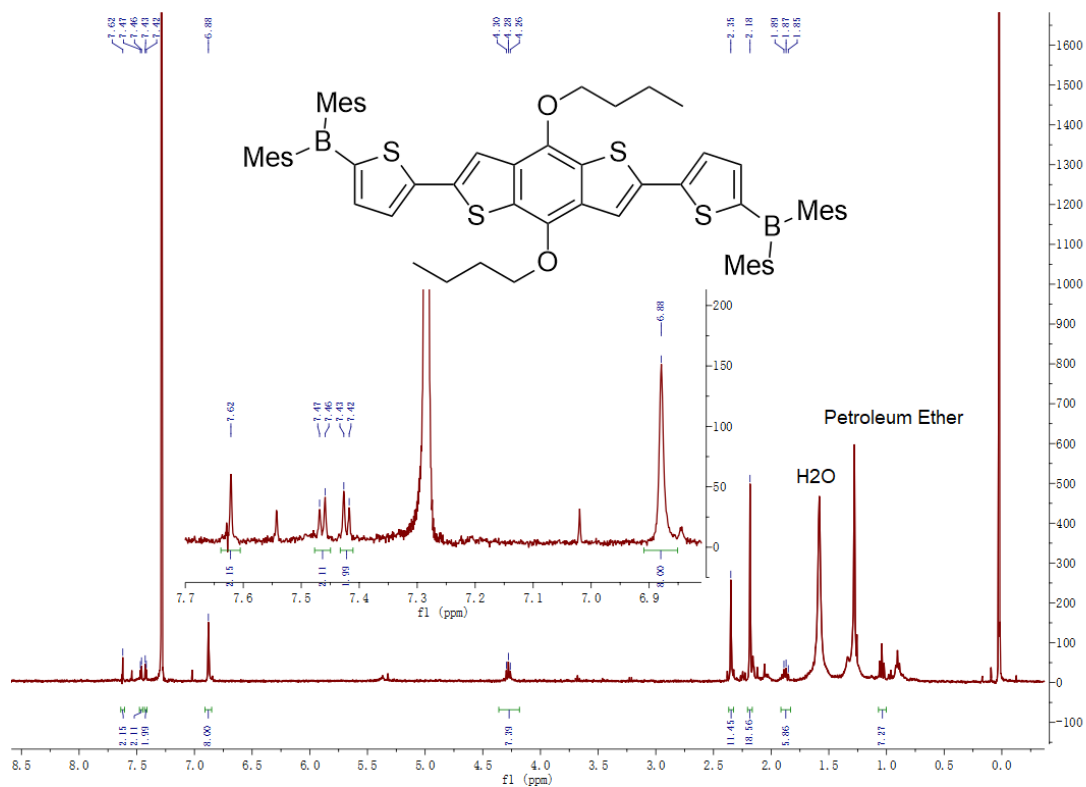

Figure S-12. <sup>1</sup>H NMR spectrum of compound 4 (400 MHz, CDCl<sub>3</sub>).

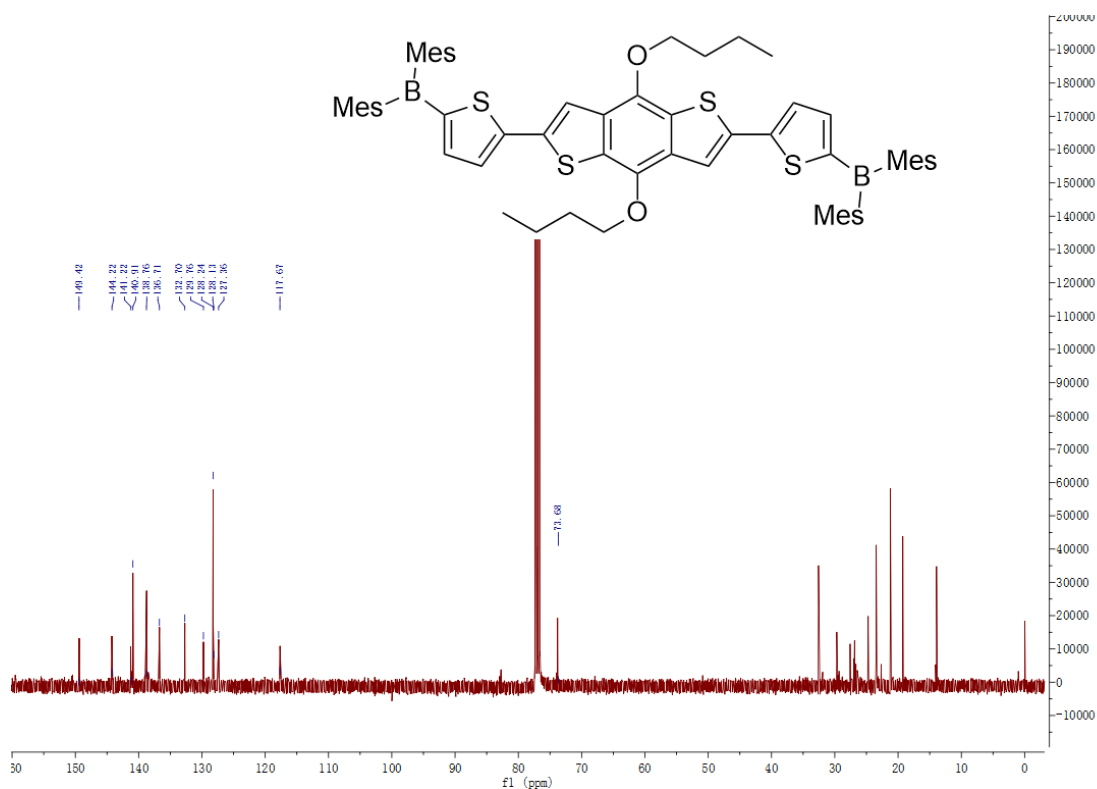

Figure S-13. <sup>13</sup>C NMR spectrum of compound 4 (100 MHz, CDCl<sub>3</sub>).

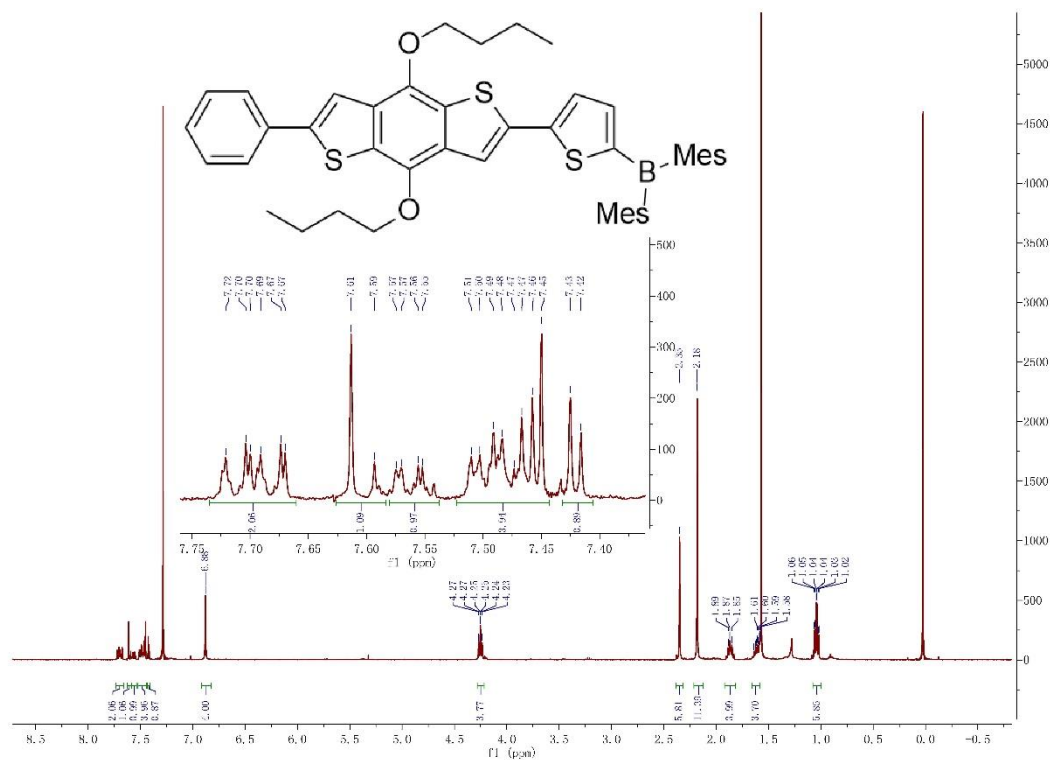

Figure S-14. <sup>1</sup>H NMR spectrum of compound 4' (400 MHz, CDCl<sub>3</sub>).

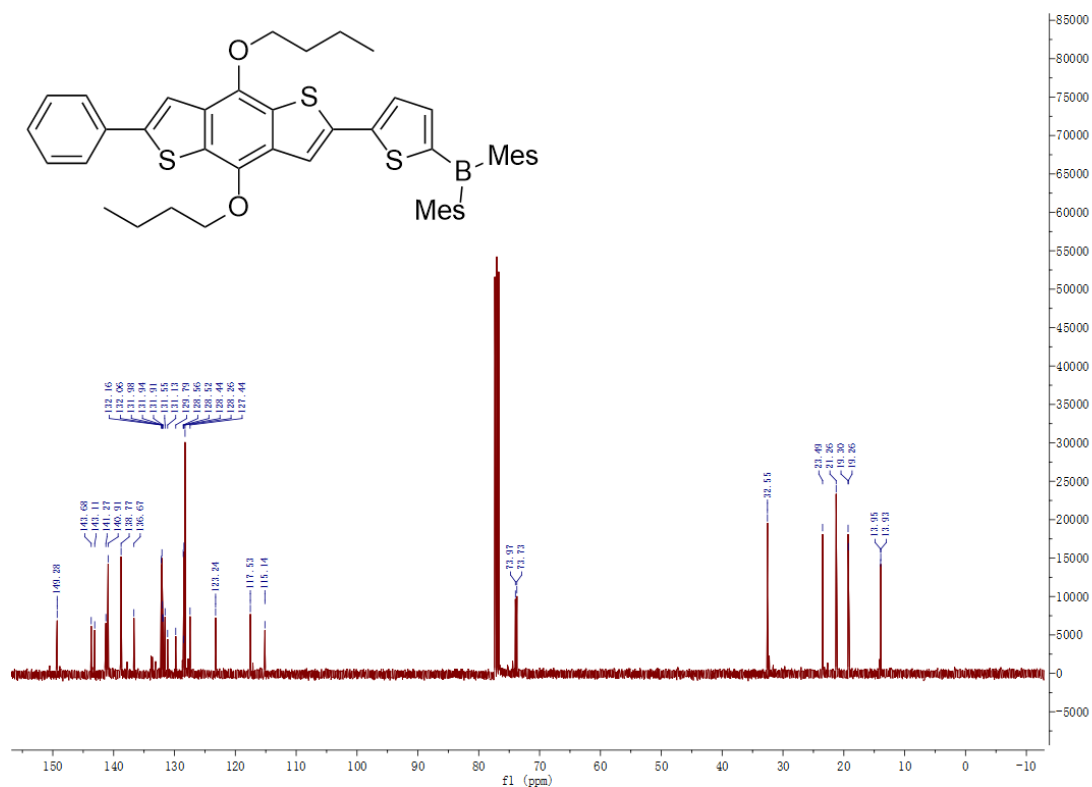

Figure S-15. <sup>13</sup>C NMR spectrum of compound 4' (100 MHz, CDCl<sub>3</sub>).



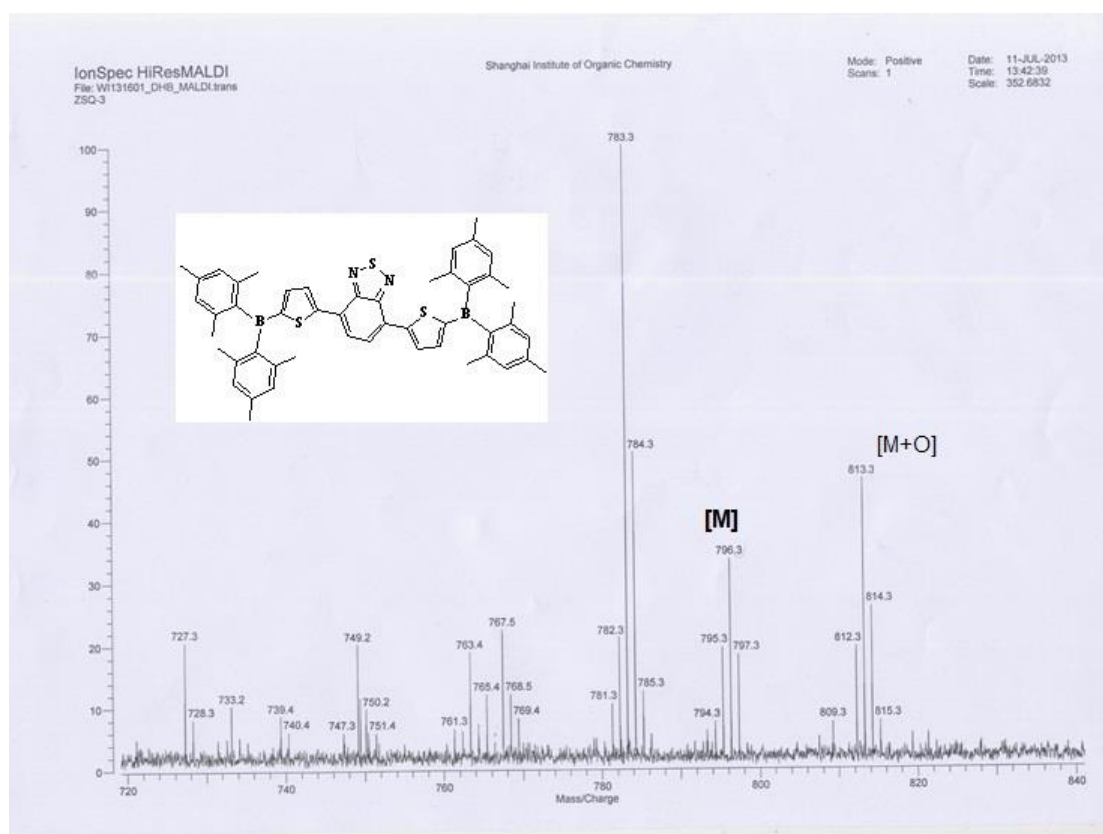

Figure S-18. MS spectra of compound 1.

Instrument: IonSpec 4.7 Tesla FTMS

Card Serial Number : W113 1602

Sample Serial Number: ZSQ-3

Operator : HuaQin Date: 2013/07/11

Operation Mode: MALDI/DHB

**Elemental Composition Search Report:**

**Target Mass:**

Target m/z = 794.3408 ± 0.003  
 Charge = +1

**Possible Elements:**

| Element | Exact Mass | Min | Max |
|---------|------------|-----|-----|
| C       | 12.000000  | 0   | 100 |
| H       | 1.007825   | 0   | 100 |
| 10B     | 10.012937  | 0   | 2   |
| N       | 14.003074  | 0   | 5   |
| S       | 31.972071  | 0   | 5   |

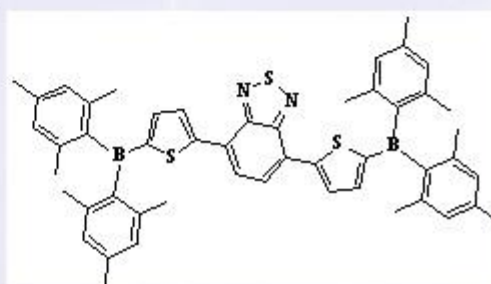

**Additional Search Restrictions:**

DBE Limit Mode = Both Integer and Half-Integer  
 Minimum DBE = 0

**Search Results:**

Number of Hits = 9

| m/z       | Delta m/z | DBE  | Formula                                                                                                  |
|-----------|-----------|------|----------------------------------------------------------------------------------------------------------|
| 794.34040 | 0.00040   | 40.0 | C <sub>58</sub> H <sub>42</sub> N <sub>4</sub> <sup>+1</sup>                                             |
| 794.34131 | -0.00051  | 20.5 | C <sub>46</sub> H <sub>50</sub> N <sub>5</sub> S <sub>4</sub> <sup>+1</sup>                              |
| 794.34140 | -0.00060  | 41.5 | C <sub>60</sub> H <sub>40</sub> <sup>10</sup> B <sub>2</sub> N <sup>+1</sup>                             |
| 794.34224 | -0.00144  | 18.0 | C <sub>47</sub> H <sub>60</sub> <sup>10</sup> BS <sub>5</sub> <sup>+1</sup>                              |
| 794.34231 | -0.00151  | 22.0 | C <sub>47</sub> H <sub>54</sub> <sup>10</sup> B <sub>2</sub> N <sub>2</sub> S <sub>4</sub> <sup>+1</sup> |
| 794.33894 | 0.00186   | 27.0 | C <sub>50</sub> H <sub>50</sub> <sup>10</sup> B <sub>2</sub> N <sub>2</sub> S <sub>3</sub> <sup>+1</sup> |
| 794.33887 | 0.00193   | 23.0 | C <sub>50</sub> H <sub>50</sub> <sup>10</sup> BS <sub>4</sub> <sup>+1</sup>                              |
| 794.33793 | 0.00287   | 25.5 | C <sub>48</sub> H <sub>52</sub> N <sub>5</sub> S <sub>3</sub> <sup>+1</sup>                              |
| 794.34377 | -0.00297  | 35.0 | C <sub>55</sub> H <sub>46</sub> N <sub>4</sub> S <sup>+1</sup>                                           |

Figure S-19. HR-MS data report of compound 1.



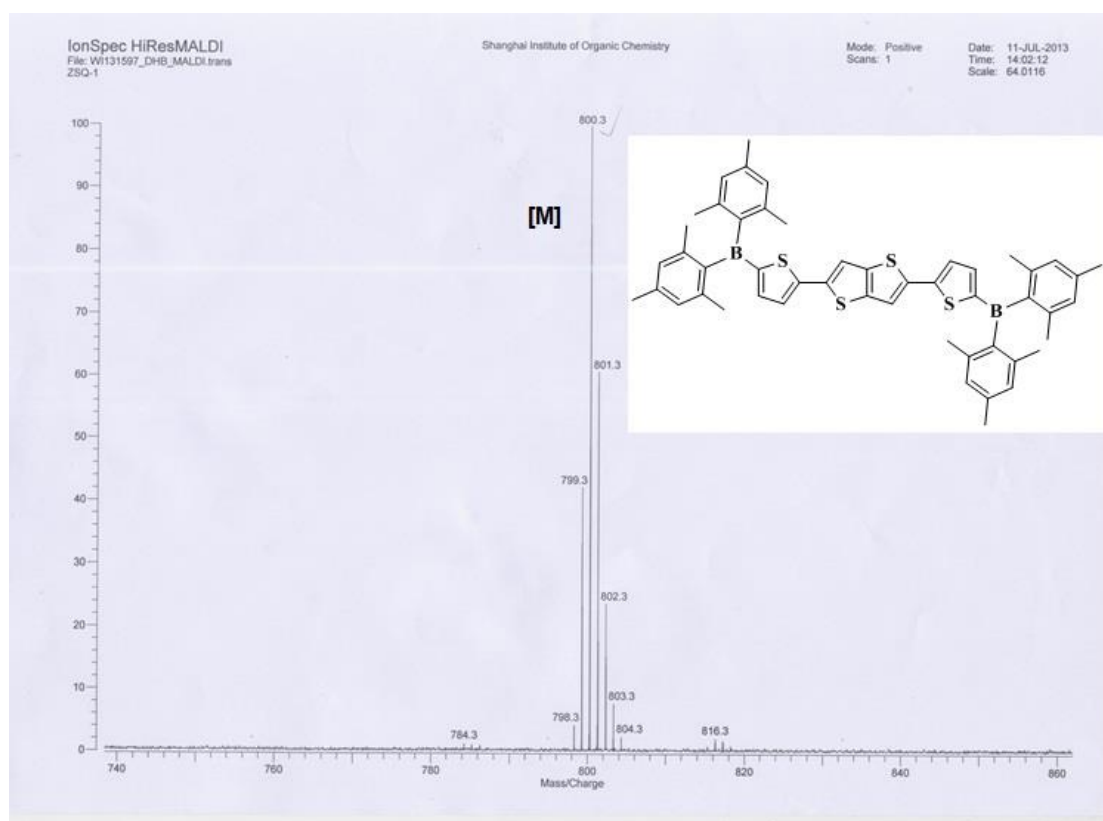

Figure S-20. MS spectra of compound **2**.

Instrument: IonSpec 4.7 Tesla FTMS

Card Serial Number : W113 1598

Sample Serial Number: ZSQ-1

Operator : HuaQin Date: 2013/07/11

Operation Mode: MALDI/DHB

**Elemental Composition Search Report:**

**Target Mass:**

Target  $m/z$  = 798.3060  $\pm$  0.003  
Charge = +1

**Possible Elements:**

| Element         | Exact Mass | Min | Max |
|-----------------|------------|-----|-----|
| C               | 12.000000  | 0   | 100 |
| H               | 1.007825   | 0   | 100 |
| <sup>10</sup> B | 10.012937  | 0   | 5   |
| S               | 31.972071  | 0   | 5   |

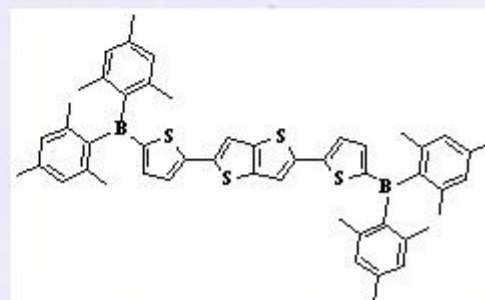

**Additional Search Restrictions:**

DBE Limit Mode = Both Integer and Half-Integer  
Minimum DBE = 0

**Search Results:**

Number of Hits = 2

| $m/z$     | Delta $m/z$ | DBE  | Formula                                                                                  |
|-----------|-------------|------|------------------------------------------------------------------------------------------|
| 798.30486 | 0.00114     | 26.0 | C <sub>50</sub> H <sub>50</sub> <sup>10</sup> B <sub>2</sub> S <sub>4</sub> <sup>+</sup> |
| 798.30823 | -0.00223    | 21.0 | C <sub>47</sub> H <sub>54</sub> <sup>10</sup> B <sub>2</sub> S <sub>5</sub> <sup>+</sup> |

Figure S-21. HR-MS data report of compound 2.

Instrument: Thermo Fisher Scientific LTQ FTICR-MS

Card Serial Number : D2021629

Sample Serial Number: SD

Operator : DONG Date: 2021/03/18

Operation Mode: DART POSITIVE

D20211629 #75 RT: 1.3434 AV: 1 NL: 5.08E5  
T: FTMS + p NSI Full ms [50.00-1200.00]

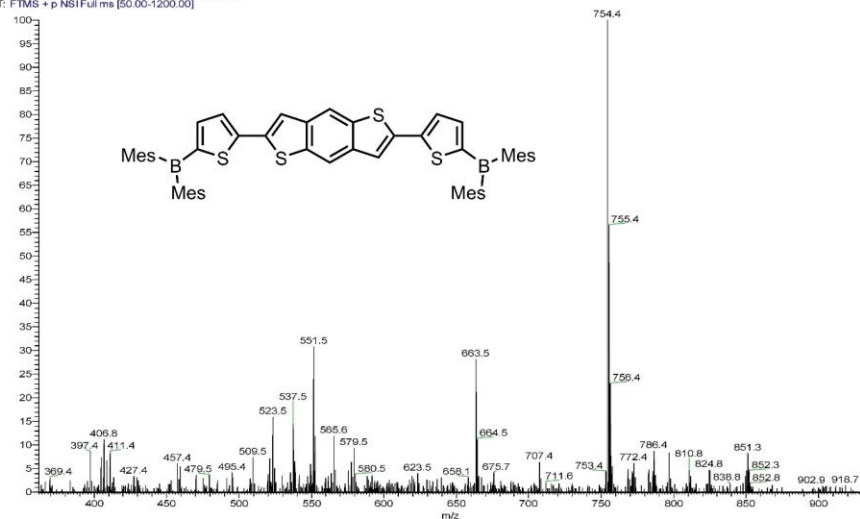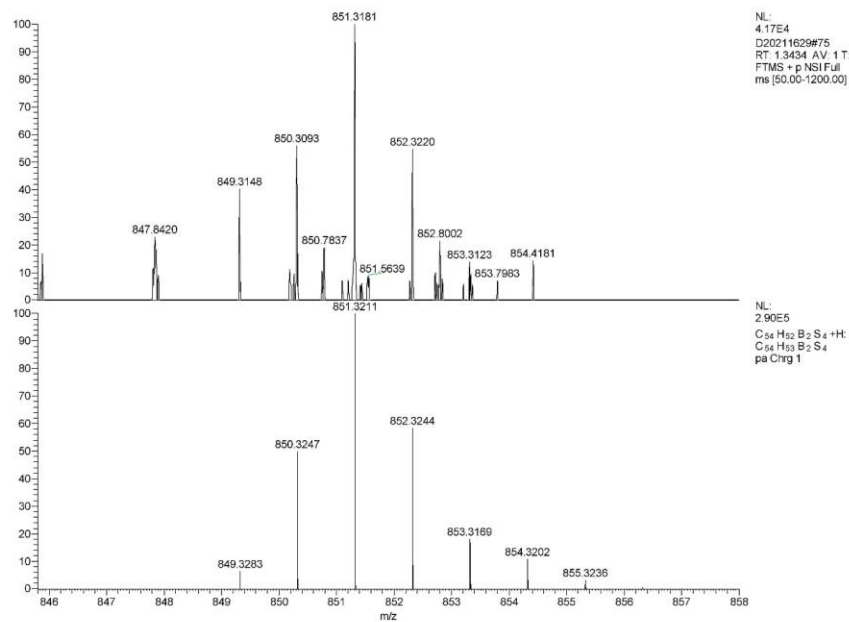

Figure S-22. HR-MS spectra of compound 3.

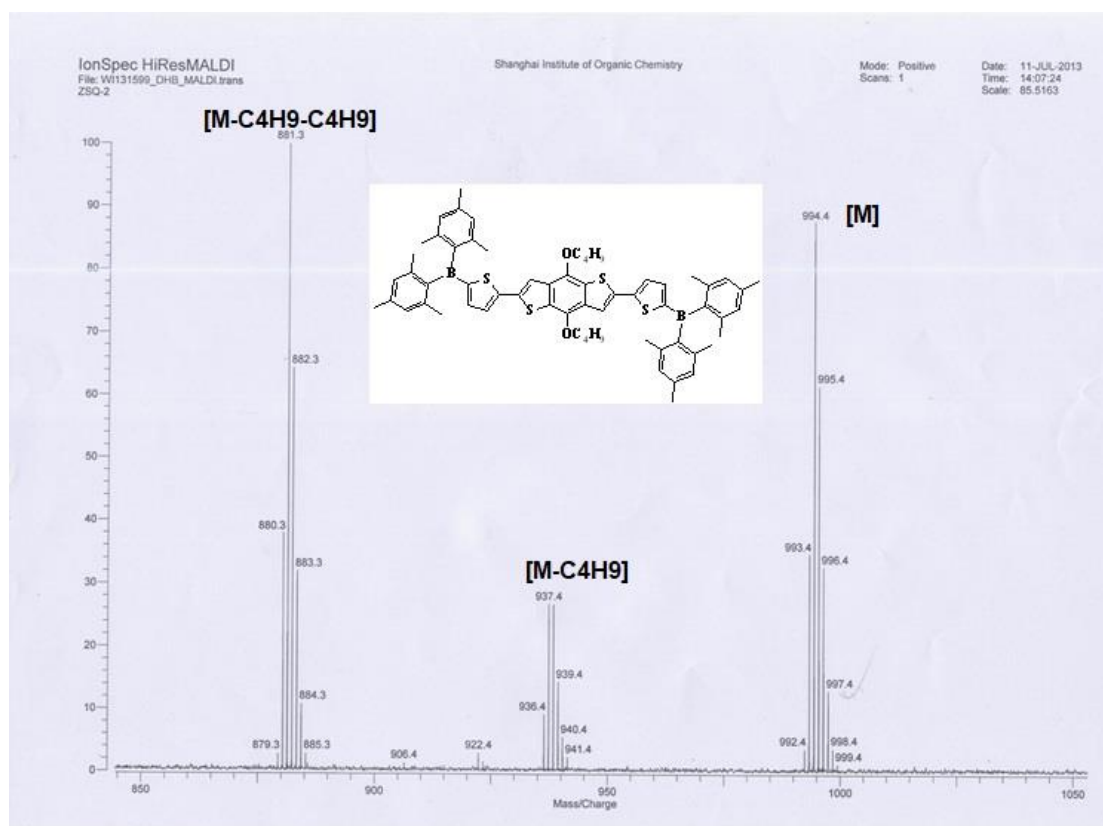

Figure S-23. MS spectra of compound 4.

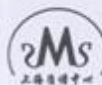

Instrument: IonSpec 4.7 Tesla FTMS

Card Serial Number : WI13 1600

Sample Serial Number: ZSQ-2

Operator : HuaQin Date: 2013/07/11

Operation Mode: MALDI/DHB

**Elemental Composition Search Report:**

**Target Mass:**

Target  $m/z = 992.4360 \pm 0.003$   
 Charge = +1

**Possible Elements:**

| Element | Exact Mass | Min | Max |
|---------|------------|-----|-----|
| C       | 12.000000  | 0   | 100 |
| H       | 1.007825   | 0   | 100 |
| 10B     | 10.012937  | 0   | 2   |
| O       | 15.994915  | 0   | 5   |
| S       | 31.972071  | 0   | 5   |

**Additional Search Restrictions:**

DBE Limit Mode = Both Integer and Half-Integer  
 Minimum DBE = 0

**Search Results:**

Number of Hits = 6

| $m/z$     | Delta $m/z$ | DBE  | Formula                           |
|-----------|-------------|------|-----------------------------------|
| 992.43588 | 0.00012     | 27.0 | $C_{62}H_{72}O_3S_4^{+1}$         |
| 992.43554 | 0.00046     | 29.0 | $C_{62}H_{68}^{10}B_2O_2S_4^{+1}$ |
| 992.43660 | -0.00060    | 40.0 | $C_{70}H_{62}^{10}BOS_2^{+1}$     |
| 992.43765 | -0.00165    | 51.0 | $C_{78}H_{66}^{+1}$               |
| 992.43322 | 0.00278     | 45.0 | $C_{73}H_{58}^{10}BOS^{+1}$       |
| 992.43891 | -0.00291    | 24.0 | $C_{59}H_{72}^{10}B_2O_2S_5^{+1}$ |

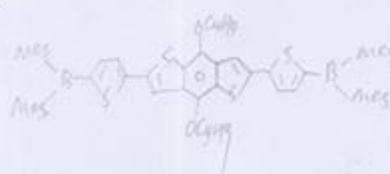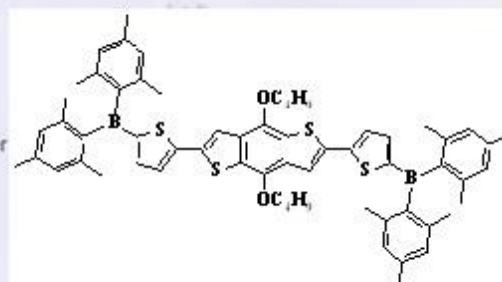

Figure S-24. HR-MS data report of compound 4.

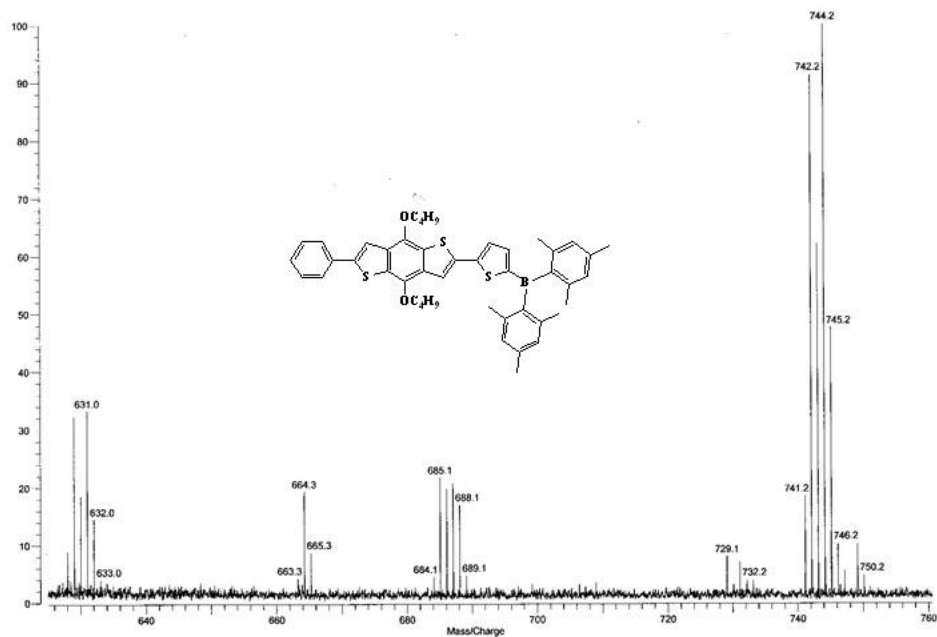

Base Formula: C46 H49 O2 S3 +  
Plus Adducts: H  
Minus Fragment Losses:

C46 H50 O2 S3 B +1  
Monoisotopic Mass: 740.30968

Calculated Isotope Distribution  
Mass Resolving Power: 30000

IonSpec Corporation  
Exact Mass Calculator

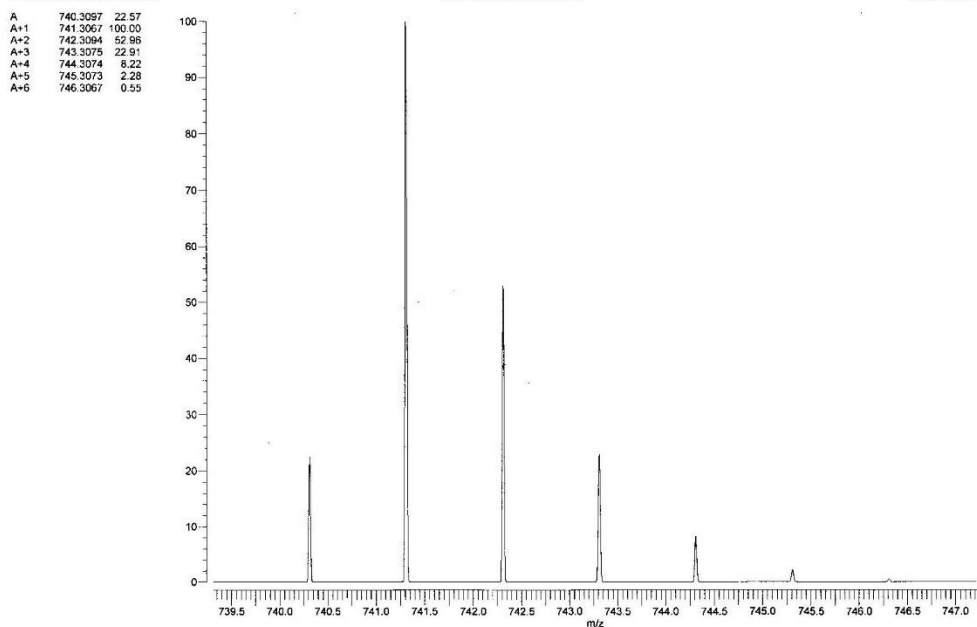

Figure S-25. MS spectra of compound 4'.

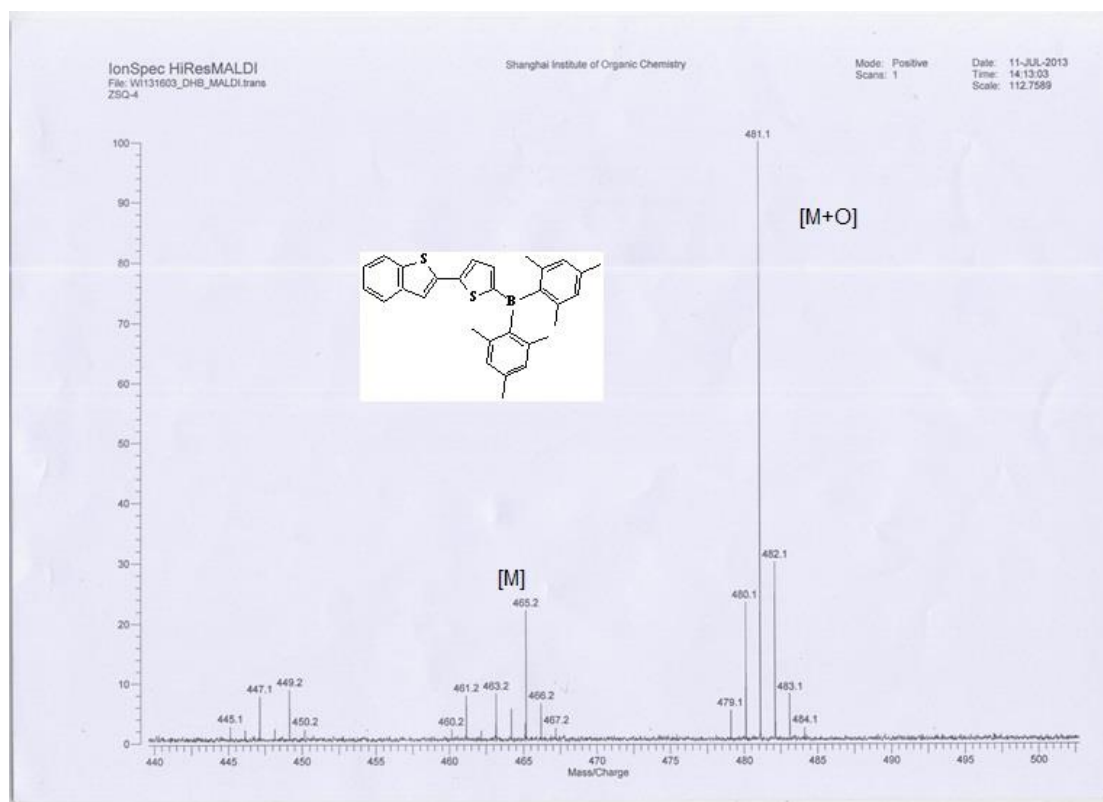

Figure S-26. MS spectra of compound 5.

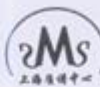

Instrument: IonSpec 4.7 Tesla FTMS

Card Serial Number : W113 1604

Sample Serial Number: ZSQ-4

Operator : HuaQin Date: 2013/07/11

Operation Mode: MALDI/DHB

**Elemental Composition Search Report:**

**Target Mass:**

Target m/z = 464.1915 ± 0.002  
Charge = +1

**Possible Elements:**

| Element | Exact Mass | Min | Max |
|---------|------------|-----|-----|
| C       | 12.000000  | 0   | 100 |
| H       | 1.007825   | 0   | 100 |
| 10B     | 10.012937  | 0   | 2   |
| S       | 31.972071  | 0   | 5   |

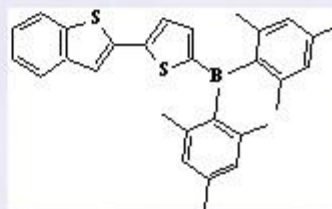

**Additional Search Restrictions:**

DBE Limit Mode = Both Integer and Half-Integer  
Minimum DBE = 0

**Search Results:**

Number of Hits = 1

| m/z       | Delta m/z | DBE  | Formula                                                                     |
|-----------|-----------|------|-----------------------------------------------------------------------------|
| 464.19128 | 0.00022   | 16.0 | C <sub>30</sub> H <sub>30</sub> <sup>10</sup> BS <sub>2</sub> <sup>+1</sup> |

Figure S-27. HR-MS data report of compound 5
